# Supplementary material for: Alkylation of benzene with methanol over hierarchical porous ZSM-5: synergy effects of hydrogen atmosphere and zinc modification
Source: Royal Society of Chemistry journal article supplement (doi:10.1039/c5ra03048j), 2015-01-01
Supplement: c5ra03048j1.pdf [file c5ra03048j1.pdf]

## Supporting Information

For

**Alkylation of benzene with methanol over hierarchical porous ZSM-**

**5: Synergy effects of hydrogen atmosphere and zinc modification**

Hualei Hu, Jinghui Lyu, Qingtao Wang, Qunfeng Zhang, Jie Cen and Xiaonian Li\*

*Industrial Catalysis Institute of Zhejiang University of Technology, State Key  
Laboratory Breeding Base of Green Chemistry Synthesis Technology, Hangzhou,  
310032, P. R. China*

Corresponding author: E-mail: [xnli@zjut.edu.cn](mailto:xnli@zjut.edu.cn). Fax: +86-571-88320667. Tel.: +86-571-88320002.

Conversion of benzene and selectivity to toluene, xylene ethylbenzene and trimethylbenzene were defined as follows:

$$\text{Conversion of benzene} = \frac{\text{benzene in feed} - \text{benzene in product}}{\text{benzene in feed}} \times 100\%$$

$$\text{Selectivity of toluene} = \frac{n(\text{toluene})}{n(\text{alkyl aromatics})} \times 100\%$$

$$\text{Selectivity of xylene} = \frac{n(\text{xylene})}{n(\text{alkyl aromatics})} \times 100\%$$

$$\text{Selectivity of ethylbenzene} = \frac{n(\text{ethylbenzene})}{n(\text{alkyl aromatics})} \times 100\%$$

$$\text{Selectivity of trimethylbenzene} = \frac{n(\text{trimethylbenzene})}{n(\text{alkyl aromatics})} \times 100\%$$

**Table S1** Textural properties of unmodified and ZnO modified ZSM-5 catalysts.

| Catalyst       | Zn content (wt%) | $S_{BET}$<br>( $m^2/g$ ) | $V_{micro}$<br>( $cm^3/g$ ) | $V_{meso}$<br>( $cm^3/g$ ) |
|----------------|------------------|--------------------------|-----------------------------|----------------------------|
|                | XPS              |                          |                             |                            |
| 0wt% ZnO/ZSM-5 | 0                | 372                      | 0.12                        | 0.19                       |
| 1wt% ZnO/ZSM-5 | 1.0              | 367                      | 0.11                        | 0.20                       |
| 2wt% ZnO/ZSM-5 | 1.7              | 363                      | 0.11                        | 0.20                       |
| 3wt% ZnO/ZSM-5 | 2.6              | 361                      | 0.11                        | 0.24                       |
| 4wt% ZnO/ZSM-5 | 4.0              | 369                      | 0.11                        | 0.24                       |

**Table S2** Catalytic performance of unmodified and ZnO modified ZSM-5 catalysts in benzene alkylation with methanol under nitrogen atmosphere.

| Catalyst       | Conversion<br>of benzene<br>(%) | Selectivity (%) |              |        |     |
|----------------|---------------------------------|-----------------|--------------|--------|-----|
|                |                                 | Toluene         | Ethylbenzene | Xylene | TMB |
| 0wt% ZnO/ZSM-5 | 51.5                            | 47.8            | 2.6          | 33.8   | 8.9 |
| 1wt% ZnO/ZSM-5 | 51.8                            | 52.3            | 0.7          | 34.6   | 8.3 |
| 2wt% ZnO/ZSM-5 | 49.9                            | 54.5            | 0.3          | 32.4   | 6.8 |
| 3wt% ZnO/ZSM-5 | 41.5                            | 58.7            | 0.1          | 25.0   | 5.1 |
| 4wt% ZnO/ZSM-5 | 37.5                            | 62.3            | 0.1          | 24.5   | 4.4 |

TMB: Trimethylbenzene

**Table S3** Catalytic performance of unmodified and ZnO modified ZSM-5 catalysts in benzene alkylation with methanol under hydrogen atmosphere.

| Catalyst       | Conversion of benzene (%) | Selectivity (%) |              |        |      |
|----------------|---------------------------|-----------------|--------------|--------|------|
|                |                           | Toluene         | Ethylbenzene | Xylene | TMB  |
| 0wt% ZnO/ZSM-5 | 51.6                      | 47.2            | 2.5          | 34.2   | 9.2  |
| 1wt% ZnO/ZSM-5 | 53.6                      | 47.4            | 1.0          | 35.9   | 10.5 |
| 2wt% ZnO/ZSM-5 | 51.8                      | 52.2            | 0.6          | 34.6   | 8.1  |
| 3wt% ZnO/ZSM-5 | 49.1                      | 54.2            | 0.3          | 33.4   | 7.7  |
| 4wt% ZnO/ZSM-5 | 48.3                      | 54.5            | 0.3          | 32.1   | 7.5  |

TMB: Trimethylbenzene

**Table S4** The stability of unmodified and ZnO modified ZSM-5 catalysts under different atmospheres.

| Time on stream (h) | Conversion of benzene (%) |       |                |       |
|--------------------|---------------------------|-------|----------------|-------|
|                    | 0wt% ZnO/ZSM-5            |       | 1wt% ZnO/ZSM-5 |       |
|                    | $N_2$                     | $H_2$ | $N_2$          | $H_2$ |
| 2                  | 51.5                      | 51.9  | 53.11          | 53.3  |
| 4                  | 51.4                      | 51.3  | 52.89          | 53.2  |
| 6                  | 51.6                      | 51.5  | 51.62          | 53.8  |
| 8                  | 51.2                      | 51.9  | 51.18          | 53.9  |
| 10                 | 51.6                      | 51.6  | 50.01          | 53.6  |

TMB: Trimethylbenzene

**Table S5** Products distribution of unmodified and ZnO modified ZSM-5 catalysts under different atmospheres.

| Components       | Catalysts and content (wt)/% |       |                |       |
|------------------|------------------------------|-------|----------------|-------|
|                  | 0wt% ZnO/ZSM-5               |       | 1wt% ZnO/ZSM-5 |       |
|                  | $N_2$                        | $H_2$ | $N_2$          | $H_2$ |
| Methane          | 0.05                         | 0.06  | 0.13           | 0.07  |
| C2               | 0.18                         | 0.17  | 0.09           | 0.19  |
| C3               | 0.52                         | 0.48  | 0.03           | 0.21  |
| C4               | 0.24                         | 0.21  | 0.00           | 0.05  |
| C5               | 0.07                         | 0.05  | 0.00           | 0.03  |
| Benzene          | 39.09                        | 38.98 | 39.73          | 36.82 |
| Toluene          | 23.33                        | 22.98 | 26.16          | 23.79 |
| Ethylbenzene     | 1.48                         | 1.40  | 0.02           | 0.63  |
| Xylene           | 19.18                        | 19.34 | 19.91          | 20.79 |
| Trimethylbenzene | 5.65                         | 5.91  | 5.06           | 6.88  |
| Other            | 10.21                        | 10.42 | 8.87           | 10.36 |

Reaction conditions: 400 °C, 1atm, WHSV=2.0 h<sup>-1</sup>, methanol to benzene molar ratio = 1:1.

**Table S6** Acidic properties of unmodified and ZnO modified ZSM-5 catalysts.

| <i>Catalyst</i> | <i>Acidity by type<sup>a</sup> (mmol/g)</i> |              |            |
|-----------------|---------------------------------------------|--------------|------------|
|                 | <i>Brönsted</i>                             | <i>Lewis</i> | <i>B/L</i> |
| 0wt% ZnO/ZSM-5  | 0.0291                                      | 0.0045       | 6.47       |
| 1wt% ZnO/ZSM-5  | 0.0159                                      | 0.0318       | 0.50       |
| 2wt% ZnO/ZSM-5  | 0.0127                                      | 0.0490       | 0.26       |
| 3wt% ZnO/ZSM-5  | 0.0093                                      | 0.0518       | 0.18       |
| 4wt% ZnO/ZSM-5  | 0.0063                                      | 0.0602       | 0.10       |

a: Density of the acid sites, assorted according to the acidic type, determined by Py-IR (recorded after evacuation at 400°C). B/L: the ratio of the amount of Brönsted acidic sites to that of Lewis acidic sites.
